# Supplementary material
Source: PubMed Central journal article supplement (PMC4730943)
Supplement: NIHMS741104-supplement-supplement_1.pdf [file NIHMS741104-supplement-supplement_1.pdf]

589 **Table Captions**

590

591 **Table 1. Demographic information**

592 **Table 2. Intrinsic geometric cortical features and their definitions**

593 **Supplementary Table 1. ADNI Initiative**

594 **Supplementary Table 2. The 140 common genes that appeared commonly in RefSeq, UCSC and**  
595 **Ensembl.**

596 **Supplementary Table 3. Gene network analysis** (Gene enrichment analysis using hypergeometric test)

597 **Supplementary Table 4. Summary of the most significant genetics and imaging phenotypes**

598 - 80 derived-bioimaging markers and the 80 SNPs

599 **Supplementary Table 5 (A). AD ranked association results**

600 **Supplementary Table 5 (B). MCI ranked association results**

601 **Supplementary Table 5 (C). NC ranked association results**

602 **Supplementary Table 6. The summary of the 29 genes**

603

---

**ADNI Initiative**

---

The National Institute on Aging (NIA), the National Institute of Biomedical Imaging and Bioengineering (NIBIB), the Food and Drug Administration (FDA) initiated the Alzheimer's Disease Neuroimaging Initiative (ADNI) in 2003. ADNI employs magnetic resonance imaging (MRI), positron emission tomography (PET), biological markers, and clinical and neuropsychological measures to detect, track and predict the progression of MCI and early AD. To aid clinical investigators in developing new treatments, assess their effectiveness, and improve efficiency (reduce time and cost of clinical trials), ADNI investigators are studying specific markers of very early AD. Michael W. Weiner, M.D., at the VA Medical Center and University of California San Francisco is the ADNI Principle Investigator. In phase I, ADNI aimed to recruit 800 adults, ages 55 to 90, to participate in the research and followed for 3 years. Details of the ADNI study design, protocols and information is available online at <http://www.adni-info.org>.

---

615 **Supplementary Table 2** The 140 common genes that appeared commonly in RefSeq, UCSC and  
 616 Ensembl.  
 617

|          |            |           |          |          |
|----------|------------|-----------|----------|----------|
| ACSS1    | COL23A1    | INSC      | NALCN    | SNTB1    |
| ADAM12   | CPVL       | ISPD      | NKAIN2   | SNX14    |
| ADAMTS12 | CSGALNACT1 | ITGA8     | NPAS3    | SORT1    |
| ADAMTSL1 | CUBN       | ITPR1     | OCA2     | STOML1   |
| ADTRP    | CYFIP2     | KBTBD12   | PDE10A   | SULF1    |
| AGBL3    | DCDC2      | KCNC2     | PDE4B    | SUPT20H  |
| ANKRD44  | DEFB129    | KCNIP1    | PML      | SV2C     |
| APBA1    | DLC1       | KCNK10    | POLR3G   | SYNPR    |
| APOE     | DSCAM      | KIF5C     | PPP3CA   | TBC1D14  |
| ARHGEF10 | EGFEM1P    | KYNU      | PREX2    | TLN2     |
| ARL11    | EHMT2      | LHPP      | PRIMA1   | TMC7     |
| ATP6V1E1 | ERC2       | LINC00326 | PSMA5    | TMEFF2   |
| BCL11A   | ETV6       | LINC00507 | PTGER3   | TMEM132C |
| BRCA2    | EXOSC8     | LINC00948 | PTPRG    | TOMM40   |
| C15orf41 | FAM188B    | LINGO2    | PVR      | TRAPPC9  |
| C2       | FAM65C     | LRRC47    | PWP2     | TRIO     |
| C21orf33 | FERMT2     | MAD2L2    | RAI1     | UBASH3B  |
| C3orf55  | FHIT       | MLLT3     | RAP1GAP2 | USP34    |
| C6orf10  | FOXP2      | MOXD1     | RCBTB1   | VEPH1    |
| CA10     | FSD1L      | MSRA      | RGS6     | VIPR1    |
| CADPS2   | GABRR1     | MTSS1     | RHOBTB3  | WDR7     |
| CCL11    | GADL1      | MYLK      | RNF150   | WFDC12   |
| CCSER1   | GALNT10    | MYO3B     | S100P    | XKR6     |
| CDA      | GNAI1      | MYOF      | SDK1     | XPO1     |
| CDH18    | GPR110     | MYT1      | SEMA5A   | XYLT1    |
| CGNL1    | HRASLS5    | N4BP2L1   | SHD      | ZBTB12   |
| CHCHD6   | IL2RA      | N4BP2L2   | SLC25A29 | ZNF343   |
| CNTN4    | IMPG1      | NAALADL2  | SNAP25   | ZNF560   |

618

619

620 **Supplementary Table 3.** Gene network analysis (Gene enrichment analysis using the hypergeometric  
621 test)

| DB                 | Overlap (Number) | Our genes (Number) | Total genes (Number) | DB (Size) | P-value (hypergeometric test) | References                                                                                                                                                 |
|--------------------|------------------|--------------------|----------------------|-----------|-------------------------------|------------------------------------------------------------------------------------------------------------------------------------------------------------|
| <b>AlzGene</b>     | 2                | 140                | 60,155               | 47        | 0.005427975                   | ALZGENE ( <a href="http://www.alzgene.org/">http://www.alzgene.org/</a> )                                                                                  |
| <b>Beige</b>       | 4                | 140                | 60,155               | 95        | 7.59E-05                      | Top 20 modules relevant to AD pathology [41].                                                                                                              |
| <b>Brown2</b>      | 5                | 140                | 60,155               | 78        | 1.17E-06                      |                                                                                                                                                            |
| <b>Darkcyan</b>    | 6                | 140                | 60,155               | 110       | 2.50E-07                      |                                                                                                                                                            |
| <b>Gold2</b>       | 6                | 140                | 60,155               | 83        | 4.65E-08                      |                                                                                                                                                            |
| <b>Gold3</b>       | 6                | 140                | 60,155               | 69        | 1.52E-08                      |                                                                                                                                                            |
| <b>Gray1</b>       | 6                | 140                | 60,155               | 52        | 2.66E-09                      |                                                                                                                                                            |
| <b>Green4</b>      | 7                | 140                | 60,155               | 56        | 6.70E-11                      |                                                                                                                                                            |
| <b>Greenyellow</b> | 13               | 140                | 60,155               | 722       | 1.72E-08                      |                                                                                                                                                            |
| <b>Grey60</b>      | 16               | 140                | 60,155               | 507       | 8.39E-14                      |                                                                                                                                                            |
| <b>Honeydew</b>    | 18               | 140                | 60,155               | 127       | 0                             |                                                                                                                                                            |
| <b>Khaki</b>       | 25               | 140                | 60,155               | 262       | 0                             |                                                                                                                                                            |
| <b>Lightyellow</b> | 28               | 140                | 60,155               | 382       | 0                             |                                                                                                                                                            |
| <b>Pink</b>        | 33               | 140                | 60,155               | 743       | 0                             |                                                                                                                                                            |
| <b>Purple</b>      | 46               | 140                | 60,155               | 805       | 0                             |                                                                                                                                                            |
| <b>Red</b>         | 55               | 140                | 60,155               | 987       | 0                             |                                                                                                                                                            |
| <b>Red2</b>        | 55               | 140                | 60,155               | 83        | 0                             |                                                                                                                                                            |
| <b>Red3</b>        | 55               | 140                | 60,155               | 67        | 0                             |                                                                                                                                                            |
| <b>Seashell</b>    | 56               | 140                | 60,155               | 278       | 0                             |                                                                                                                                                            |
| <b>Tan</b>         | 62               | 140                | 60,155               | 700       | 0                             |                                                                                                                                                            |
| <b>Yellow</b>      | 69               | 140                | 60,155               | 1108      | 0                             |                                                                                                                                                            |
| <b>KEGG</b>        | 20               | 140                | 60,155               | 168       | 0                             | KEGG pathway: hsa05010 ( <a href="http://www.genome.jp/dbget-bin/www_bget?pathway:map05010">http://www.genome.jp/dbget-bin/www_bget?pathway:map05010</a> ) |

622  
623  
624  
625  
626  
627  
628  
629  
630  
631  
632  
633  
634  
635  
636  
637  
638  
639  
640  
641  
642  
643  
644  
645  
646  
647  
648

649

650  
651  
652

**Supplementary Table 4 .** Summary of the most significant genetics and imaging phenotypes  
- 80 derived-bioimaging markers and the 80 SNPs

| Neuroimaging phenotypes       | Shape & Volume Measures | P-value  | Index | SNPs       | CHR | P-value         | Gene         |
|-------------------------------|-------------------------|----------|-------|------------|-----|-----------------|--------------|
| L_hippocampus                 | Volume                  | 8.38E-12 | 1     | rs2075650  | 19  | <b>2.93E-10</b> | TOMM40       |
| R_hippocampus                 | Volume                  | 1.68E-11 | 2     | rs11072463 | 15  | <b>1.13E-07</b> | PML          |
| L_inferior_temporal_gyrus     | Volume                  | 3.17E-09 | 3     | rs1052242  | 15  | 5.72E-07        | PML          |
| L_inferior_temporal_gyrus     | SurfaceArea             | 8.24E-09 | 4     | rs793291   | 3   | 8.28E-07        | ADAMTS9-AS2  |
| R_caudate                     | Volume                  | 1.05E-08 | 5     | rs12691813 | 2   | 9.52E-07        | -            |
| L_hippocampus                 | SurfaceArea             | 1.89E-08 | 6     | rs17027976 | 4   | 1.20E-06        | -            |
| R_caudate                     | SurfaceArea             | 2.25E-08 | 7     | rs4972310  | 2   | 1.73E-06        | -            |
| L_hippocampus                 | ShapeIndex              | 1.28E-07 | 8     | rs1975545  | 2   | 2.55E-06        | -            |
| R_hippocampus                 | SurfaceArea             | 2.63E-07 | 9     | rs4886844  | 15  | 3.39E-06        | PML          |
| R_inferior_temporal_gyrus     | Volume                  | 4.09E-07 | 10    | rs12822144 | 12  | 4.25E-06        | -            |
| R_caudate                     | Curvedness              | 1.02E-05 | 11    | rs11680332 | 2   | 5.34E-06        | -            |
| L parahippocampal_gyrus       | Volume                  | 2.38E-05 | 12    | rs734854   | 15  | 9.38E-06        | STOML1       |
| R_hippocampus                 | ShapeIndex              | 3.08E-05 | 13    | rs12036909 | 1   | 9.54E-06        | CDA          |
| L_caudate                     | SurfaceArea             | 3.88E-05 | 14    | rs6427160  | 1   | 1.02E-05        | -            |
| L_caudate                     | Volume                  | 4.00E-05 | 15    | rs439401   | 19  | 1.15E-05        | APOE         |
| R parahippocampal_gyrus       | Volume                  | 5.23E-05 | 16    | rs11579101 | 1   | 1.62E-05        | CDA          |
| R parahippocampal_gyrus       | ShapeIndex              | 5.56E-05 | 17    | rs12512622 | 4   | 1.86E-05        | -            |
| R_inferior_temporal_gyrus     | Curvedness              | 5.99E-05 | 18    | rs4886387  | 13  | 1.96E-05        | -            |
| R_inferior_temporal_gyrus     | SurfaceArea             | 6.24E-05 | 19    | rs157580   | 19  | 2.97E-05        | TOMM40       |
| L_superior_temporal_gyrus     | Volume                  | 6.82E-05 | 20    | rs9896368  | 17  | 3.13E-05        | GAS2L2       |
| L parahippocampal_gyrus       | SurfaceArea             | 9.22E-05 | 21    | rs16885921 | 5   | 4.09E-05        | CDH18        |
| R_inferior_temporal_gyrus     | AverageMeanCurvature    | 1.08E-04 | 22    | rs7985759  | 13  | 4.23E-05        | -            |
| L_middle_temporal_gyrus       | SurfaceArea             | 1.33E-04 | 23    | rs2883782  | 2   | 5.14E-05        | MYO3B        |
| L_hippocampus                 | Curvedness              | 1.46E-04 | 24    | rs7902368  | 10  | 5.29E-05        | -            |
| L_fusiform_gyrus              | Volume                  | 1.57E-04 | 25    | rs4829605  | 23  | 5.28E-05        | -            |
| R parahippocampal_gyrus       | AverageMeanCurvature    | 1.60E-04 | 26    | rs11726692 | 4   | 6.03E-05        | RNF150       |
| L_superior_temporal_gyrus     | SurfaceArea             | 1.65E-04 | 27    | rs17430865 | 1   | 6.32E-05        | -            |
| R_hippocampus                 | AverageMeanCurvature    | 2.91E-04 | 28    | rs259659   | 1   | 6.79E-05        | -            |
| L_fusiform_gyrus              | SurfaceArea             | 3.11E-04 | 29    | rs1469259  | 4   | 6.87E-05        | -            |
| R_fusiform_gyrus              | Volume                  | 3.70E-04 | 30    | rs7578676  | 2   | 7.13E-05        | -            |
| R parahippocampal_gyrus       | SurfaceArea             | 4.07E-04 | 31    | rs7903954  | 10  | 7.32E-05        | LOC100129821 |
| L_caudate                     | AverageMeanCurvature    | 4.65E-04 | 32    | rs1701506  | 18  | 7.72E-05        | -            |
| L_inferior_temporal_gyrus     | ShapeIndex              | 5.15E-04 | 33    | rs1498853  | 3   | 7.77E-05        | -            |
| R_hippocampus                 | Curvedness              | 5.89E-04 | 34    | rs11899232 | 2   | 8.43E-05        | KIF5C        |
| R_inferior_occipital_gyrus    | ShapeIndex              | 6.08E-04 | 35    | rs17028008 | 4   | 8.71E-05        | -            |
| R_insular_cortex              | Volume                  | 6.26E-04 | 36    | rs17246639 | 11  | 8.80E-05        | LOC100507145 |
| L_caudate                     | Curvedness              | 6.27E-04 | 37    | rs7146951  | 14  | 9.12E-05        | -            |
| L_lateral_orbitofrontal_gyrus | AverageMeanCurvature    | 6.43E-04 | 38    | rs1801406  | 13  | 9.33E-05        | BRCA2        |
| L_insular_cortex              | ShapeIndex              | 6.98E-04 | 39    | rs2799182  | 1   | 9.63E-05        | LOC388588    |
| R_fusiform_gyrus              | SurfaceArea             | 7.47E-04 | 40    | rs9301386  | 13  | 9.69E-05        | -            |
| L_putamen                     | ShapeIndex              | 8.09E-04 | 41    | rs3846829  | 6   | 1.00E-04        | DCDC2        |
| L_precentral_gyrus            | ShapeIndex              | 1.11E-03 | 42    | rs8027939  | 15  | 1.02E-04        | -            |
| R_middle_temporal_gyrus       | Volume                  | 1.41E-03 | 43    | rs288496   | 3   | 1.02E-04        | -            |
| L_middle_temporal_gyrus       | Volume                  | 1.53E-03 | 44    | rs2518112  | 9   | 1.03E-04        | FSD1L        |
| R_caudate                     | AverageMeanCurvature    | 2.16E-03 | 45    | rs462074   | 21  | 1.05E-04        | -            |

|                               |                      |          |    |            |    |          |          |
|-------------------------------|----------------------|----------|----|------------|----|----------|----------|
| L_lateral_orbitofrontal_gyrus | Volume               | 2.65E-03 | 46 | rs4899412  | 14 | 1.07E-04 | RGS6     |
| L_putamen                     | Curvedness           | 2.81E-03 | 47 | rs3842979  | 9  | 1.08E-04 | LINGO2   |
| L_insular_cortex              | Volume               | 3.10E-03 | 48 | rs12018260 | 13 | 1.15E-04 | -        |
| L_putamen                     | Volume               | 3.41E-03 | 49 | rs7494784  | 15 | 1.19E-04 | -        |
| R_superior_temporal_gyrus     | SurfaceArea          | 3.75E-03 | 50 | rs288503   | 3  | 1.19E-04 | -        |
| R_superior_temporal_gyrus     | Volume               | 3.90E-03 | 51 | rs1934935  | 10 | 1.22E-04 | -        |
| L_superior_temporal_gyrus     | ShapeIndex           | 4.92E-03 | 52 | rs11252839 | 10 | 1.22E-04 | -        |
| R_middle_temporal_gyrus       | SurfaceArea          | 5.08E-03 | 53 | rs2829647  | 21 | 1.27E-04 | -        |
| R_superior_temporal_gyrus     | Curvedness           | 5.51E-03 | 54 | rs9711441  | 2  | 1.26E-04 | KIF5C    |
| R_inferior_occipital_gyrus    | Volume               | 6.28E-03 | 55 | rs1788070  | 18 | 1.26E-04 | -        |
| R_inferior_temporal_gyrus     | ShapeIndex           | 6.84E-03 | 56 | rs2697269  | 2  | 1.29E-04 | ANKRD44  |
| R_superior_temporal_gyrus     | ShapeIndex           | 7.07E-03 | 57 | rs4807567  | 19 | 1.29E-04 | SHD      |
| brainstem                     | ShapeIndex           | 7.21E-03 | 58 | rs12352272 | 9  | 1.29E-04 | ADAMTSL1 |
| L_lingual_gyrus               | ShapeIndex           | 7.88E-03 | 59 | rs1334496  | 23 | 1.32E-04 | -        |
| R_middle_orbitofrontal_gyrus  | Curvedness           | 8.49E-03 | 60 | rs7661978  | 4  | 1.37E-04 | -        |
| L_putamen                     | SurfaceArea          | 8.87E-03 | 61 | rs10820813 | 9  | 1.40E-04 | FSD1L    |
| L_cingulate_gyrus             | ShapeIndex           | 1.14E-02 | 62 | rs7326137  | 13 | 1.42E-04 | NALCN    |
| R_superior_temporal_gyrus     | AverageMeanCurvature | 1.39E-02 | 63 | rs11620374 | 13 | 1.44E-04 | -        |
| R_fusiform_gyrus              | Curvedness           | 1.42E-02 | 64 | rs1396260  | 6  | 1.46E-04 | -        |
| L parahippocampal_gyrus       | AverageMeanCurvature | 1.48E-02 | 65 | rs895792   | 1  | 1.47E-04 | -        |
| L_caudate                     | ShapeIndex           | 1.57E-02 | 66 | rs746947   | 3  | 1.48E-04 | -        |
| R_middle_frontal_gyrus        | ShapeIndex           | 1.83E-02 | 67 | rs7268938  | 20 | 1.48E-04 | -        |
| R_fusiform_gyrus              | AverageMeanCurvature | 1.83E-02 | 68 | rs10464068 | 5  | 1.49E-04 | COL23A1  |
| R_inferior_occipital_gyrus    | SurfaceArea          | 1.89E-02 | 69 | rs6569792  | 6  | 1.55E-04 | MOXD1    |
| L_fusiform_gyrus              | Curvedness           | 2.35E-02 | 70 | rs6090754  | 20 | 1.57E-04 | -        |
| R_insular_cortex              | SurfaceArea          | 2.57E-02 | 71 | rs4972269  | 2  | 1.60E-04 | KIF5C    |
| R parahippocampal_gyrus       | Curvedness           | 2.62E-02 | 72 | rs1392188  | 3  | 1.60E-04 | -        |
| R_cingulate_gyrus             | Curvedness           | 2.62E-02 | 73 | rs7839488  | 8  | 1.61E-04 | SNTB1    |
| R_lateral_orbitofrontal_gyrus | Curvedness           | 2.76E-02 | 74 | rs11951324 | 5  | 1.62E-04 | ZNF474   |
| R_postcentral_gyrus           | Curvedness           | 2.88E-02 | 75 | rs645184   | 11 | 1.62E-04 | -        |
| R_superior_frontal_gyrus      | ShapeIndex           | 2.93E-02 | 76 | rs1981542  | 4  | 1.63E-04 | -        |
| R_postcentral_gyrus           | AverageMeanCurvature | 3.15E-02 | 77 | rs2137962  | 8  | 1.67E-04 | -        |
| R_superior_parietal_gyrus     | Volume               | 3.26E-02 | 78 | rs4075242  | 11 | 1.70E-04 | -        |
| L_lateral_orbitofrontal_gyrus | SurfaceArea          | 3.81E-02 | 79 | rs2649734  | 3  | 1.71E-04 | -        |
| R_superior_occipital_gyrus    | Volume               | 3.89E-02 | 80 | rs1048009  | 4  | 1.73E-04 | TBC1D14  |

| SNPs               | Imaging biomarkers                                      | P-values  |
|--------------------|---------------------------------------------------------|-----------|
| rs2137962 (Chr 8)  | L parahippocampal_gyrus (SurfaceArea)                   | 0.0000222 |
| rs2137962 (Chr 8)  | L_hippocampus (SurfaceArea)                             | 0.0000432 |
| rs4829605 (Chr23)  | R_inferior_temporal_gyrus (Curvedness)                  | 0.0000729 |
| rs17430865 (Chr 1) | R_cingulate_gyrus (Curvedness)                          | 0.000081  |
| rs259659 (Chr 1)   | L_lateral_orbitofrontal_gyrus<br>(AverageMeanCurvature) | 0.000112  |
| rs2137962 (Chr 8)  | L_hippocampus (Volume)                                  | 0.000106  |
| rs2137962 (Chr 8)  | L parahippocampal_gyrus (Volume)                        | 0.000204  |
| rs2137962 (Chr 8)  | R parahippocampal_gyrus (SurfaceArea)                   | 0.000223  |
| rs2137962 (Chr 8)  | R_hippocampus (SurfaceArea)                             | 0.000213  |
| rs2137962 (Chr 8)  | R_hippocampus (Curvedness)                              | 0.000246  |
| rs2137962 (Chr 8)  | R parahippocampal_gyrus (Curvedness)                    | 0.000285  |
| rs2137962 (Chr 8)  | R_hippocampus (Volume)                                  | 0.000353  |
| rs2137962 (Chr 8)  | L_insular_cortex (Volume)                               | 0.000417  |
| rs259659 (Chr 1)   | L_lateral_orbitofrontal_gyrus (Volume)                  | 0.000483  |
| rs2137962 (Chr 8)  | R_hippocampus (AverageMeanCurvature)                    | 0.000576  |
| rs645184 (Chr 11)  | R_hippocampus (SurfaceArea)                             | 0.000616  |
| rs2137962 (Chr 8)  | R parahippocampal_gyrus (Volume)                        | 0.000997  |
| rs2137962 (Chr 8)  | R_superior_temporal_gyrus<br>(AverageMeanCurvature)     | 0.001118  |
| rs2137962 (Chr 8)  | L_hippocampus (Curvedness)                              | 0.001186  |
| rs1981542 (Chr 4)  | L_caudate (ShapeIndex)                                  | 0.001202  |
| rs2137962 (Chr 8)  | L_fusiform_gyrus (Curvedness)                           | 0.001366  |

660

**Supplementary Table 5 (B).** MCI ranked association results

661

| <b>SNPs</b>         | <b>Imaging biomarkers</b>                           | <b>P-values</b> |
|---------------------|-----------------------------------------------------|-----------------|
| rs1334496 (Chr 23)  | R_inferior_temporal_gyrus (Curvedness)              | 937e-10         |
| rs1334496 (Chr 23)  | R_inferior_temporal_gyrus<br>(AverageMeanCurvature) | 0.0000182       |
| rs4829605 (Chr 23)  | R_inferior_temporal_gyrus (Curvedness)              | 0.000358        |
| rs1801406 (Chr 13)  | R_superior_occipital_gyrus (Volume)                 | 0.000381        |
| rs1788070 (Chr 18)  | R_lateral_orbitofrontal_gyrus (Curvedness)          | 0.000413        |
| rs2697269 (Chr 2)   | R_cingulate_gyrus (Curvedness)                      | 0.000539        |
| rs12822214 (Chr 12) | R_cingulate_gyrus(Curvedness)                       | 0.000534        |
| rs17028008 (Chr 4)  | R_fusiform_gyrus (AverageMeanCurvature)             | 0.000741        |
| rs1702797 (Chr 4)   | R_fusiform_gyrus (AverageMeanCurvature)             | 0.000933        |
| rs1788070 (Chr 18)  | L_fusiform_gyrus (Curvedness)                       | 0.001057        |
| rs7146951 (Chr 14)  | R_middle_orbitofrontal_gyrus (Curvedness)           | 0.001091        |
| rs1125283 (Chr 10)  | R_superior_occipital_gyrus (Volume)                 | 0.001178        |
| rs6090754 (Chr 20)  | R_lateral_orbitofrontal_gyrus (Curvedness)          | 0.001341        |
| rs2829647 (Chr 21)  | R_inferior_occipital_gyrus (ShapeIndex)             | 0.001617        |
| rs2829647 (Chr 21)  | L_putamen (Curvedness)                              | 0.001617        |
| rs2075650 (Chr 19)  | R_caudate (Curvedness)                              | 0.001713        |
| rs1788070 (Chr 18)  | L_hippocampus (ShapeIndex)                          | 0.001732        |
| rs2075650 (Chr 19)  | R_caudate (volume)                                  | 0.002271        |
| rs1251262 (Chr 4)   | R_fusiform_gyrus (AverageMeanCurvature)             | 0.002574        |
| rs8027939 (Chr 15)  | L_putamen (ShapeIndex)                              | 0.003718        |

662



663

**Supplementary Table 5 (C).** NC ranked association results

664

| <b>SNPs</b>         | <b>Imaging biomarkers</b>                    | <b>P-values</b> |
|---------------------|----------------------------------------------|-----------------|
| rs1469259 (Chr 4)   | R_hippocampus (Curvedness)                   | 0.000986        |
| rs6569792 (Chr 6)   | R_inferior_occipital_gyrus (SurfaceArea)     | 0.001042        |
| rs7902368 (Chr 10)  | L_caudate (AverageMeanCurvature)             | 0.001047        |
| rs11620374 (Chr 13) | L_fusiform_gyrus (Volume)                    | 0.001055        |
| rs11899232 (Chr 2)  | R_middle_orbitofrontal_gyrus<br>(Curvedness) | 0.001071        |
| rs4972269 (Chr 2)   | R_middle_orbitofrontal_gyrus<br>(Curvedness) | 0.001358        |
| rs1469259 (Chr 4)   | R_hippocampus (AverageMeanCurvature)         | 0.001448        |
| rs4886844 (Chr 15)  | R_hippocampus (Volume)                       | 0.001482        |
| rs11680332 (Chr 2)  | L_putamen (ShapeIndex)                       | 0.002418        |
| rs1052242 (Chr 15)  | R_insular_cortex (Volume)                    | 0.002407        |
| rs9301386 (Chr 13)  | L_cingulate_gyrus (ShapeIndex)               | 0.002552        |
| rs4899412 (Chr 14)  | L_caudate (SurfaceArea)                      | 0.002992        |
| rs17430865 (Chr 1)  | brainstem (ShapeIndex)                       | 0.002983        |
| rs6569792 (Chr 6)   | L_middle_temporal_gyrus (Volume)             | 0.002966        |
| rs4886844 (Chr 15)  | R_hippocampus (SurfaceArea)                  | 0.003117        |
| rs4886844 (Chr 15)  | R_insular_cortex (Volume)                    | 0.003176        |
| rs1052242 (Chr 15)  | R_hippocampus (Volume)                       | 0.003103        |
| rs7902368 (Chr 10)  | L_lateral_orbitofrontal_gyrus (Volume)       | 0.003162        |
| rs11072463 (Chr 15) | R_insular_cortex (Volume)                    | 0.003349        |
| rs11620374 (Chr 13) | L_fusiform_gyrus (SurfaceArea)               | 0.003401        |

665

| Genes               | Summary for the genes                                                                                                                                                                                                                                                                                                                                                                                                          |
|---------------------|--------------------------------------------------------------------------------------------------------------------------------------------------------------------------------------------------------------------------------------------------------------------------------------------------------------------------------------------------------------------------------------------------------------------------------|
| <b>TOMM40</b>       | The gene is for the channel-forming subunit of a translocase of the mitochondrial outer membrane (TOM) that is essential for protein transport into mitochondria.                                                                                                                                                                                                                                                              |
| <b>PML</b>          | The gene codes for 'promyelocytic leukemia' protein that prevents cells from growing and dividing too rapidly or in an uncontrolled manner and interacts with other proteins that are involved in cell growth and division (proliferation) as well as in self-destruction (apoptosis). This gene is often involved in the translocation with the retinoic acid receptor alpha gene implicated in acute promyelocytic leukemia. |
| <b>ADAMTS9-AS2</b>  | The gene is for ADAMTS9 antisense RNA 2 (link RNA). ADAMTS9 is expressed in spinal cord and brain along with other tissues and is a susceptibility gene for type-2 diabetes, also for LOAD.                                                                                                                                                                                                                                    |
| <b>STOML1</b>       | The gene codes for stomatin (EPB72)-like 1.                                                                                                                                                                                                                                                                                                                                                                                    |
| <b>APOE</b>         | The gene provides instructions for making a protein called apolipoprotein E which combines with fats (lipids) in the body to form molecules called lipoproteins.                                                                                                                                                                                                                                                               |
| <b>CDA</b>          | The gene is for 'cytidine deaminase' which is associated with decreased sensitivity to the cytosine nucleoside analogue cytosine arabinoside used in the treatment.                                                                                                                                                                                                                                                            |
| <b>GAS2L2</b>       | The gene codes for 'growth arrest-specific 2 like 2' that appears to crosslink microtubules and microfilaments and may be part of the cytoskeleton.                                                                                                                                                                                                                                                                            |
| <b>CDH18</b>        | The gene codes a type II classical cadherin from the cadherin superfamily of integral membrane proteins.                                                                                                                                                                                                                                                                                                                       |
| <b>MYO3B</b>        | The gene is associated with probable actin-based motor with a protein kinase activity.                                                                                                                                                                                                                                                                                                                                         |
| <b>RNF150</b>       | The gene is for 'ring finger protein 150' which is a protein-coding gene.                                                                                                                                                                                                                                                                                                                                                      |
| <b>LOC100129821</b> | The gene has sufficient evidence that the predicted model represents a distinct locus.                                                                                                                                                                                                                                                                                                                                         |
| <b>KIF5C</b>        | The gene mediates dendritic trafficking of mRNAs.                                                                                                                                                                                                                                                                                                                                                                              |
| <b>LOC100507145</b> | The gene is mir-100-let-7a-2 cluster host gene (non-protein coding).                                                                                                                                                                                                                                                                                                                                                           |
| <b>BRCA2</b>        | The gene is involved in double-strand break repair and/or homologous recombination.                                                                                                                                                                                                                                                                                                                                            |
| <b>LOC388588</b>    | The gene is small integral membrane protein 1 (SMIMI1).                                                                                                                                                                                                                                                                                                                                                                        |
| <b>DCDC2</b>        | The gene may be involved in neuronal migration during development of the cerebral neocortex.                                                                                                                                                                                                                                                                                                                                   |

|                 |                                                                                                                                                                                                                                                                                |
|-----------------|--------------------------------------------------------------------------------------------------------------------------------------------------------------------------------------------------------------------------------------------------------------------------------|
| <b>FSD1L</b>    | The gene is for 'fibronectin type III and SPRY domain containing 1-like' which is a protein-coding gene (related to molecular function).                                                                                                                                       |
| <b>RGS6</b>     | The gene is for 'regulator of G-protein signaling 6' which inhibits signal transduction by increasing the GTPase activity of G protein alpha subunits thereby driving them into their inactive GDP-bound form.                                                                 |
| <b>LINGO2</b>   | The gene is for 'leucine rich repeat and Ig domain containing 2' which is a protein-coding gene. Diseases associated with LINGO2 include neuronitis and essential tremor.                                                                                                      |
| <b>KIF5C</b>    | The gene is for kinesin heavy chain isoform 5C which mediates dendritic trafficking of mRNAs. Kinesin is a microtubule-associated force-producing protein that may play a role in organelle transport.                                                                         |
| <b>ANKRD44</b>  | The gene is for 'ankyrin repeat domain 44' which is putative regulatory subunit of protein phosphatase 6 (PP6) that may be involved in the recognition of phosphoprotein substrates.                                                                                           |
| <b>SHD</b>      | The gene may function as an adapter protein.                                                                                                                                                                                                                                   |
| <b>ADAMTSL1</b> | The gene codes a secreted protein and member of the ADAMTS (a disintegrin and metalloproteinase with thrombospondin motif) family.                                                                                                                                             |
| <b>NALCN</b>    | The gene is responsible for the background sodium ion leak current in neurons and controls neuronal excitability.                                                                                                                                                              |
| <b>COL23A1</b>  | The gene is for 'collagen type 23, alpha 1' which is a member of the transmembrane collagens, a subfamily of the nonfibrillar collagens that contain a single pass hydrophobic transmembrane domain.                                                                           |
| <b>MOXD1</b>    | The gene is for 'monooxygenase DBH-like 1' which maintains many of the structural features of dopamine beta-monooxygenase DBH; the SNTB1 gene may link various receptors to the actin cytoskeleton and the dystrophin glycoprotein complex.                                    |
| <b>SNTB1</b>    | The gene encodes a DNA binding protein that specifically binds nuclear matrix attachment regions. The encoded protein is involved in transcription regulation and chromatin remodeling. Defects in this gene are associated with isolated cleft palate and mental retardation. |
| <b>ZNF474</b>   | The gene is for 'zinc finger protein 474' which is a protein coding gene (zinc ion binding).                                                                                                                                                                                   |
| <b>TBC1D14</b>  | The gene is for 'TBC1 Domain Family, Member 14' which is a negative regulator of starvation-induced autophagosome formation.                                                                                                                                                   |

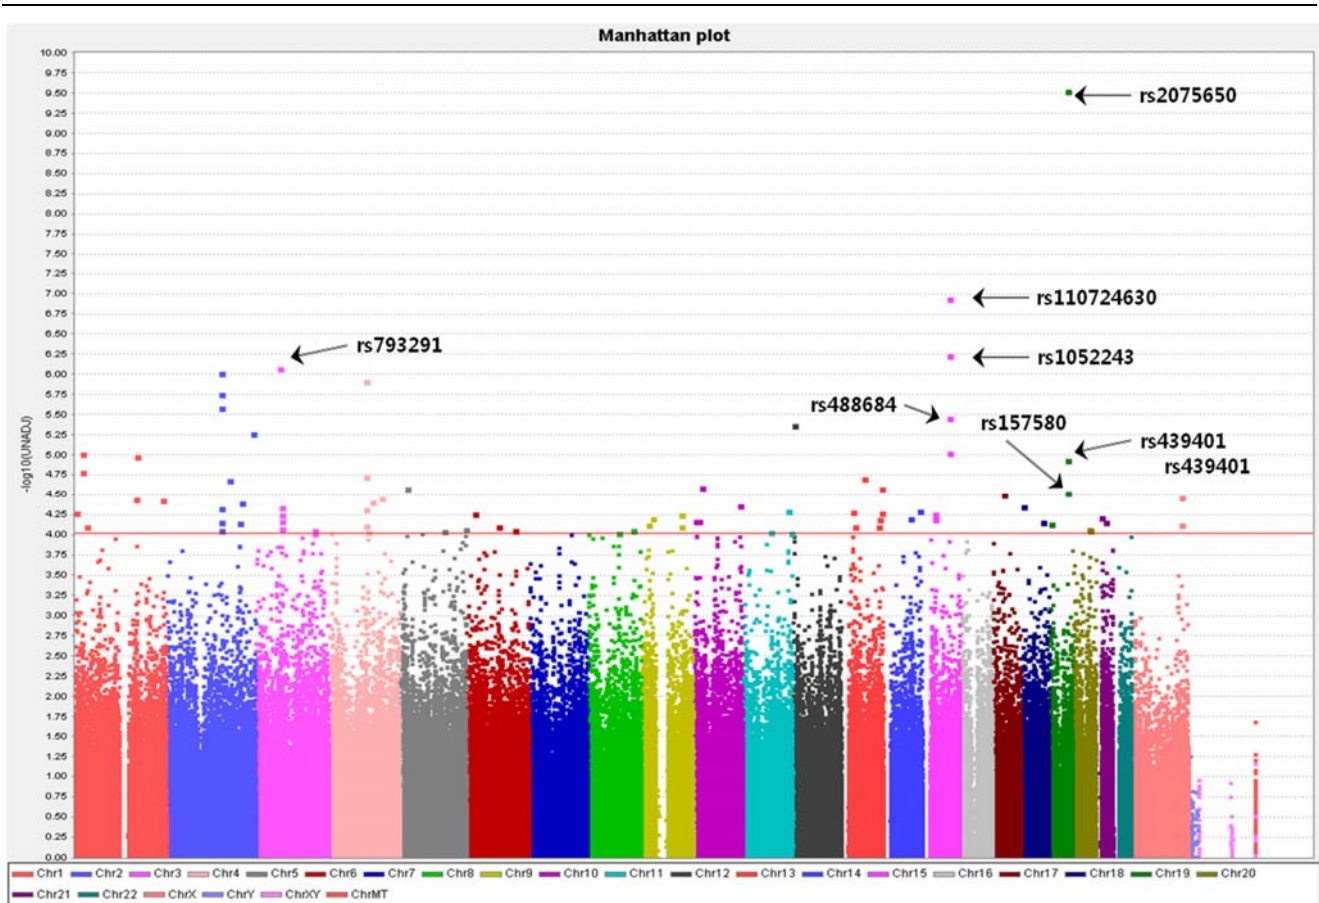

**Fig. 5. Manhattan plot (80 SNPs)**

**Supplementary Fig. 1**

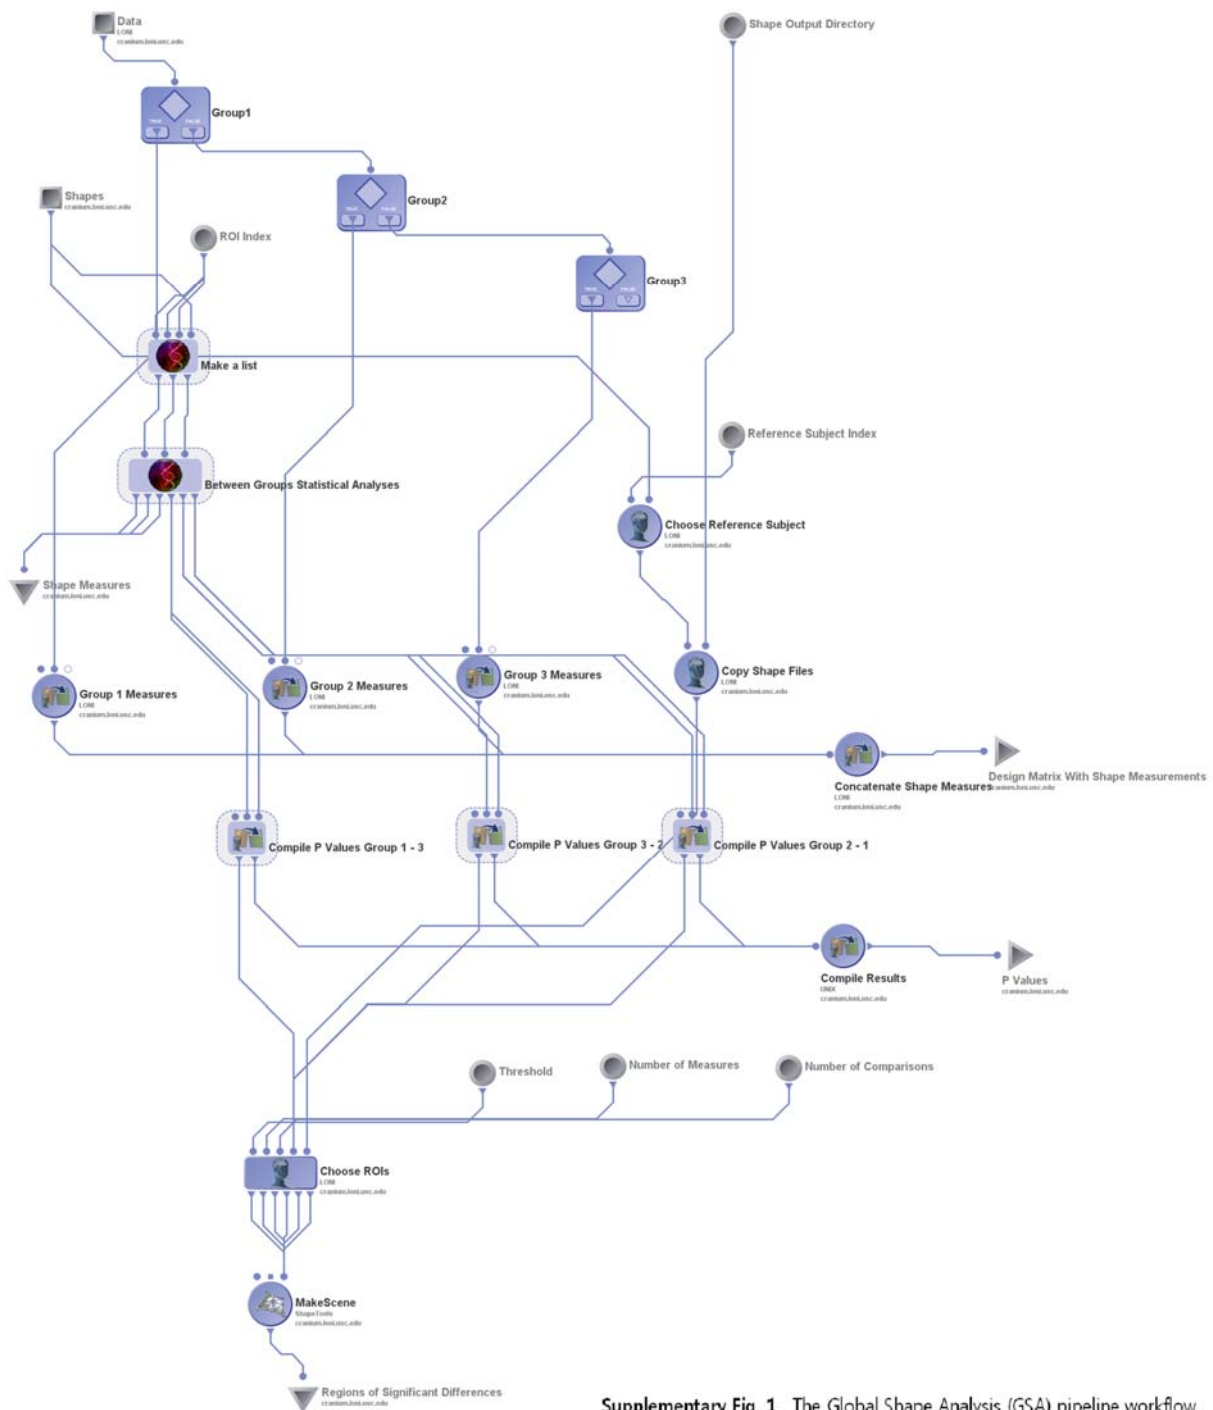

Supplementary Fig. 1. The Global Shape Analysis (GSA) pipeline workflow

Supplementary Fig. 2(A). GWAS association between 80 SNPs and 80 neuroimaging markers (AD)

### AD\_80x80\_Assoc\_P\_values.csv

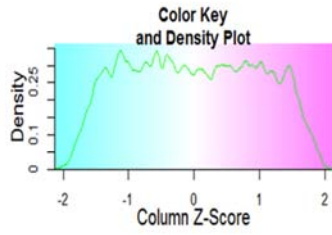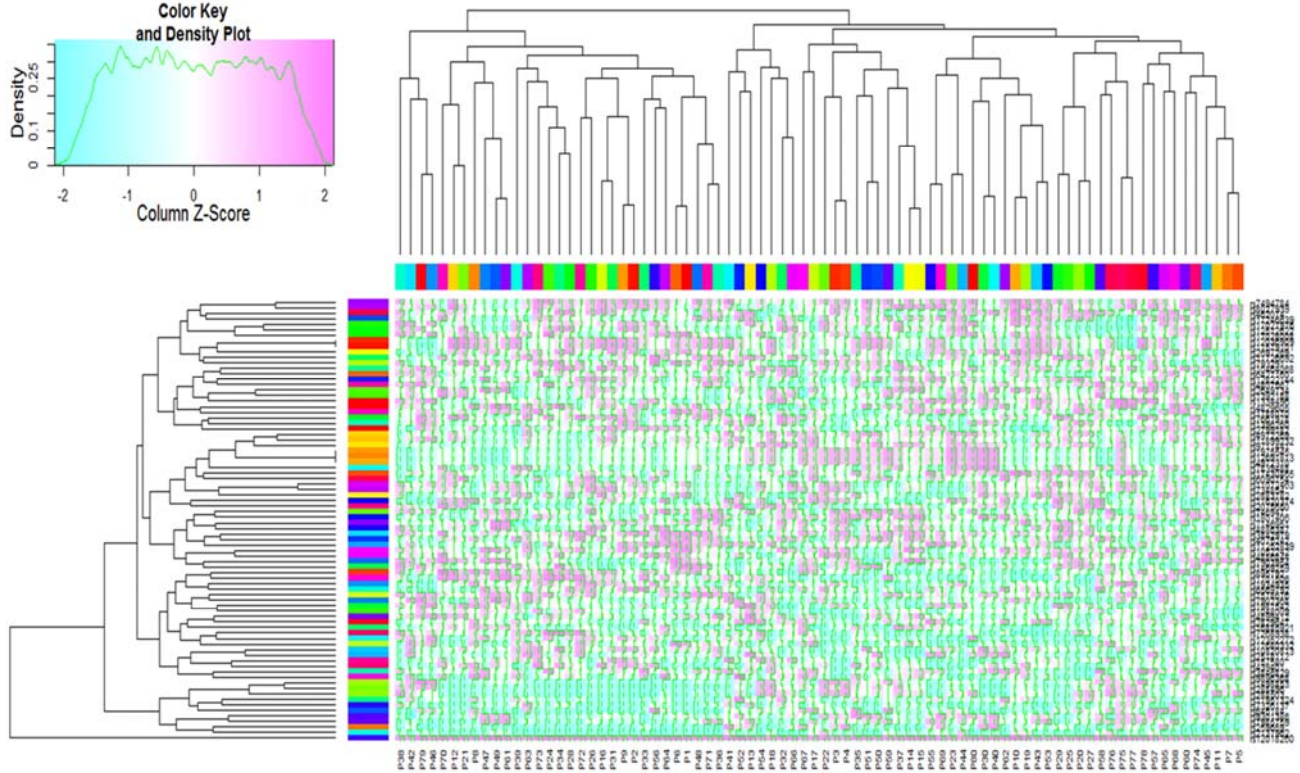

Supplementary Fig. 2(A). GWAS association between 80 SNPs and 80 neuroimaging markers (AD)

Supplementary Fig. 2(B). GWAS association between 80 SNPs and 80 neuroimaging markers(MCI)

# MCI\_80x80\_Assoc\_P\_values.csv

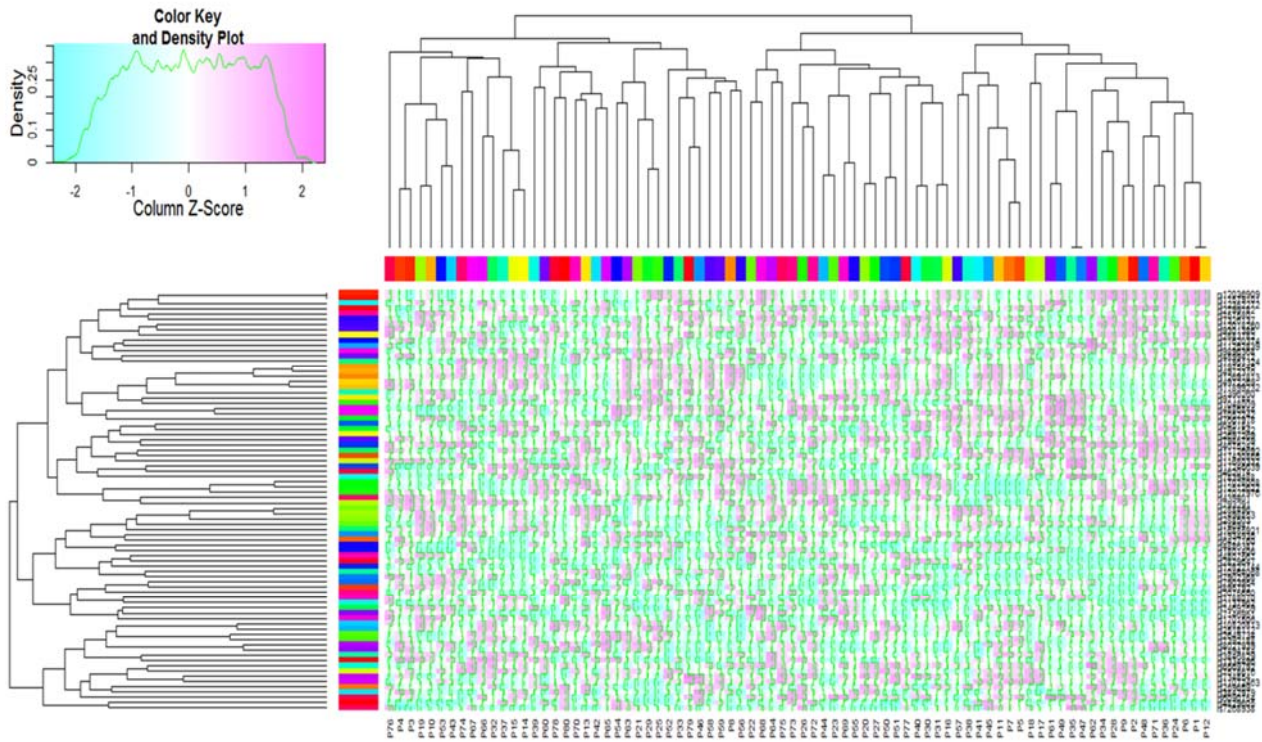

**Supplementary Fig. 2(B).** GWAS association between 80 SNPs and 80 neuroimaging markers (MCI)

**Supplementary Fig. 2(C).** GWAS association between 80 SNPs and 80 neuroimaging

markers (NC)

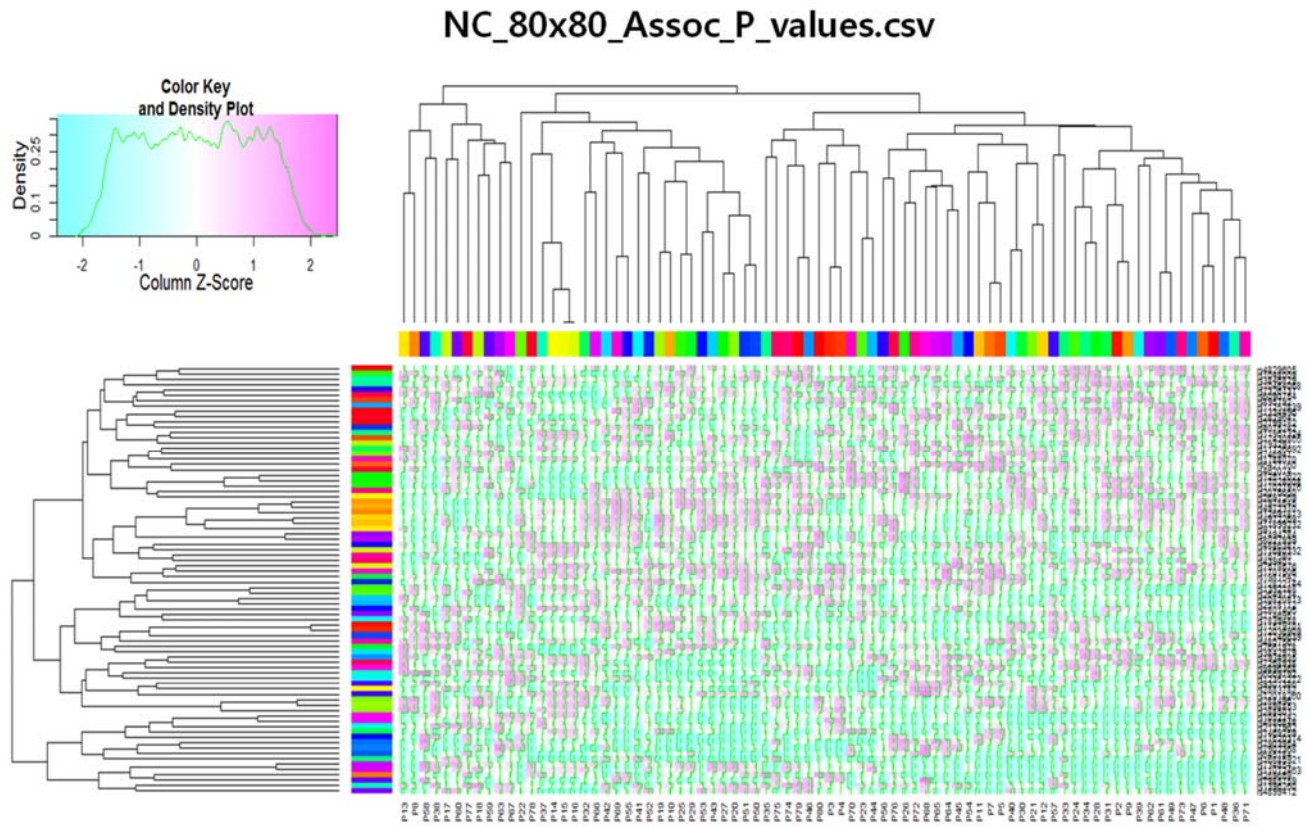

**Supplementary Fig. 2(C).** GWAS association between 80 SNPs and 80 neuroimaging markers (NC)

**Supplementary Fig. 3.** PLINK workflows



### Supplementary Fig. 3. PLINK workflows

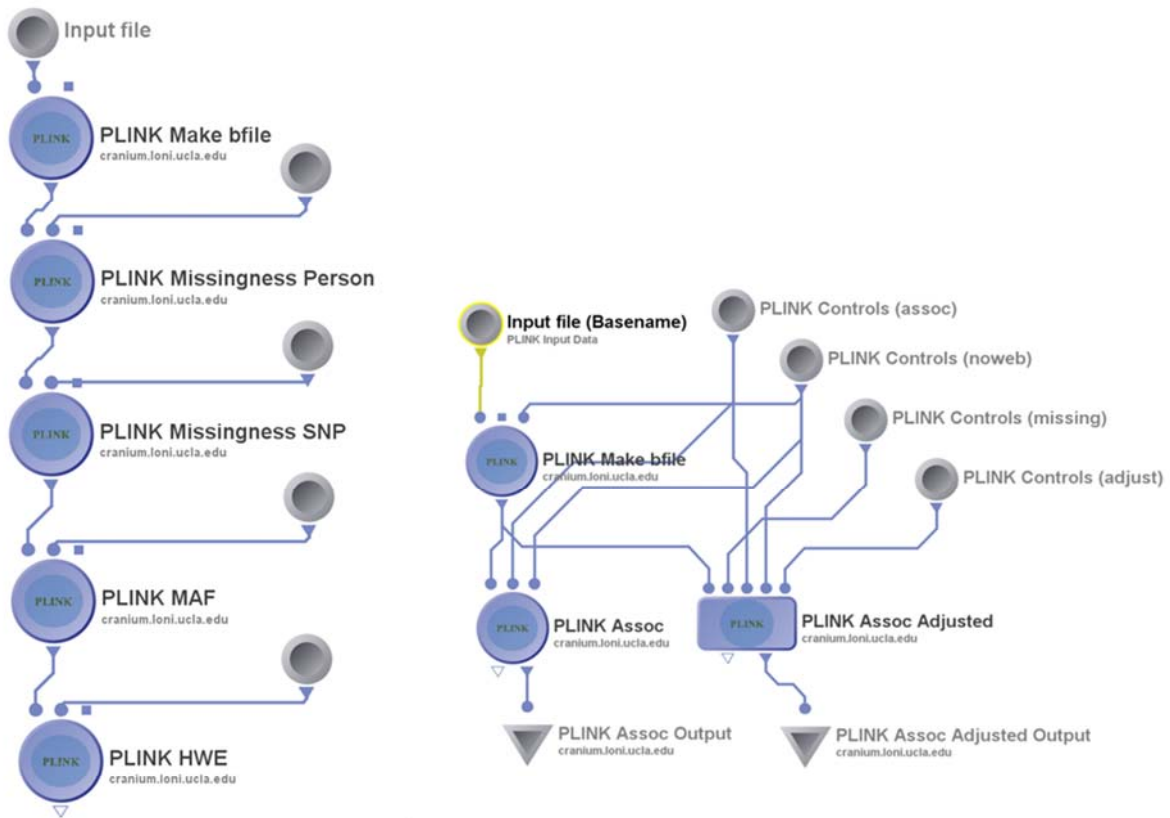

A: The pipeline workflow for QC

B: Genetic association study

### Supplementary Fig. 3. PLINK workflows

### Supplementary Fig. 4

---

Each of the SNPs (represented by unique RS sequence ID) and each shape morphometry measure, corresponding to the most important ROIs, are represented in the connectogram graph by circularly arranged ideograms. Appearance models (style and color) indicate the relative impact of the corresponding SNP (right) and ROI measure (left semicircle). Data tracks comprise the two concentric rings in the outer shell of the graph. Translocations between circular segments are shown as chordal curves that connect regions brought into adjacency by magnitude of the p-value representing the strength of the SNP-ROI association according to the results of the statistical tests. These represent normalized inverse p-values ( $1/p$ ), so large cell values correspond to small p-values and bright/wide ribbons on the circus connectogram graphs.

*Legend : Neuroimaging biomarkers / SNPs are in the 'Supplementary Table 1' P1-P80 is corresponding with index numbers [Supplementary Table 1]*

**Supplementary Fig. 4 (A). AD\_80\*80\_Association\_P\_values\_Circos**

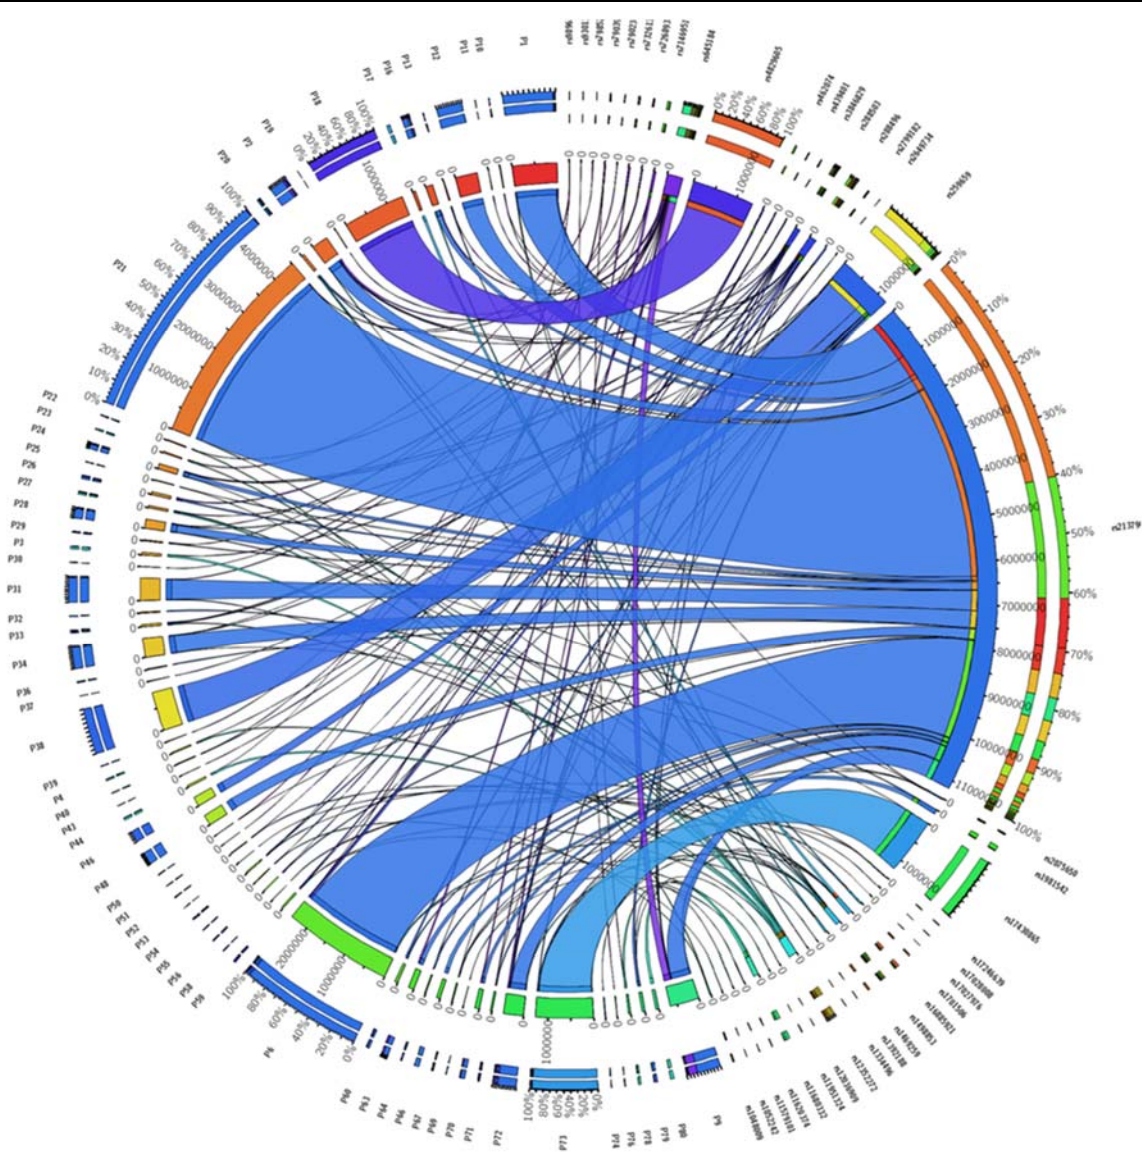

**Supplementary Fig. 4(A).** AD\_80\*80\_Association\_P\_values\_Circos

**Supplementary Fig. 4(B).** MCI\_80\*80\_Association\_P-values\_Circos

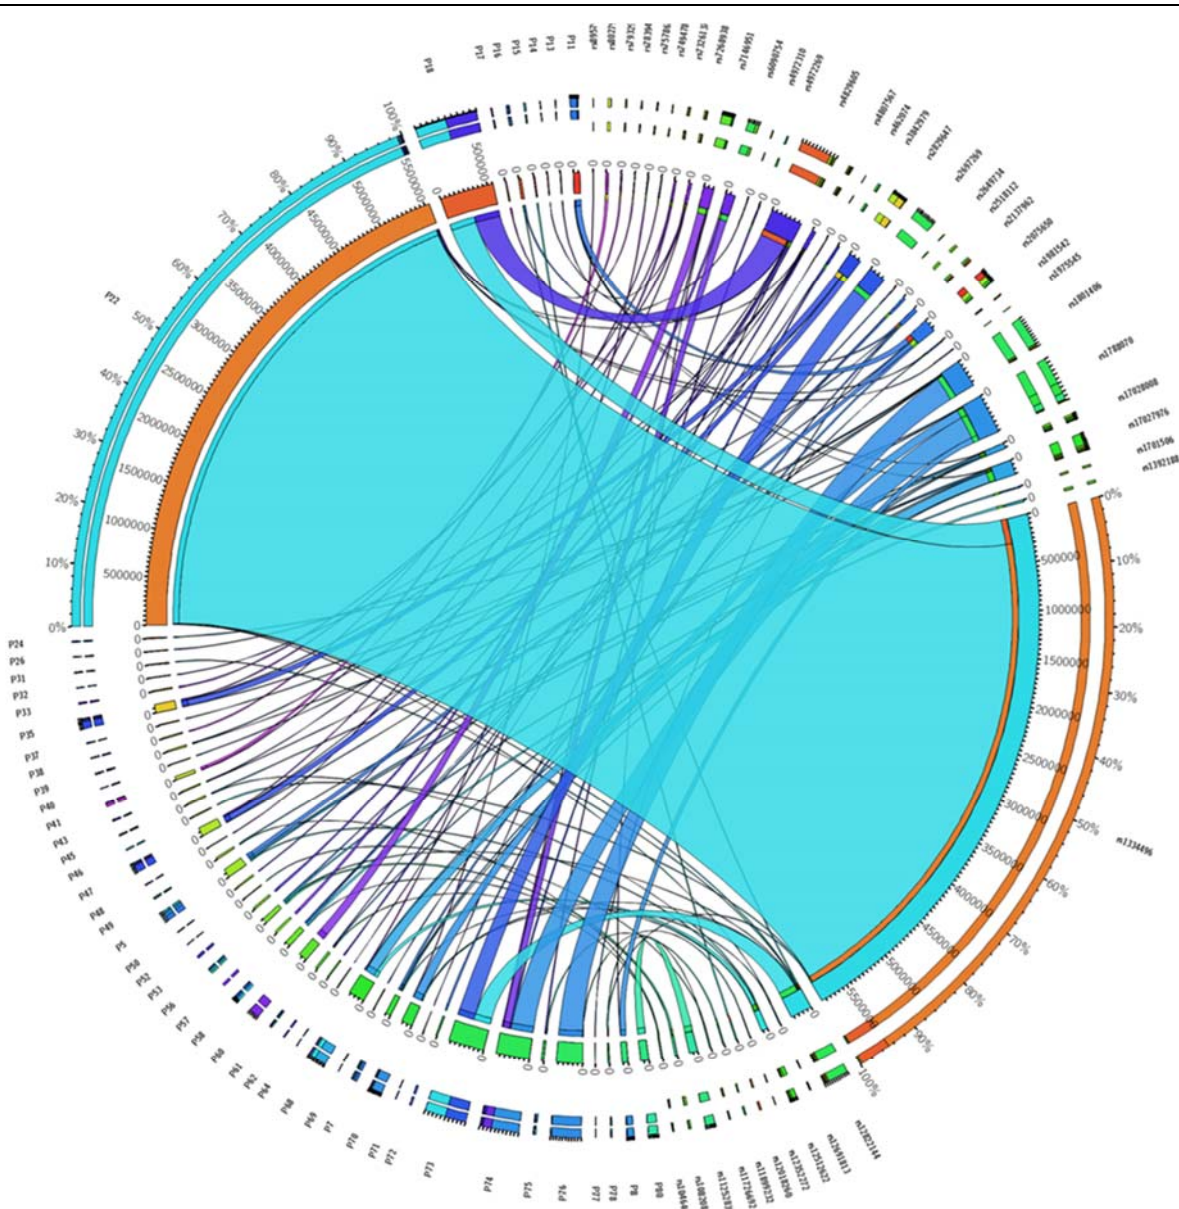

Supplementary Fig. 4(B). MCI 80\*80\_Association\_P\_values\_Circos

Supplementary Fig. 4(C). NC\_80\*80\_Association\_P-values\_Circos

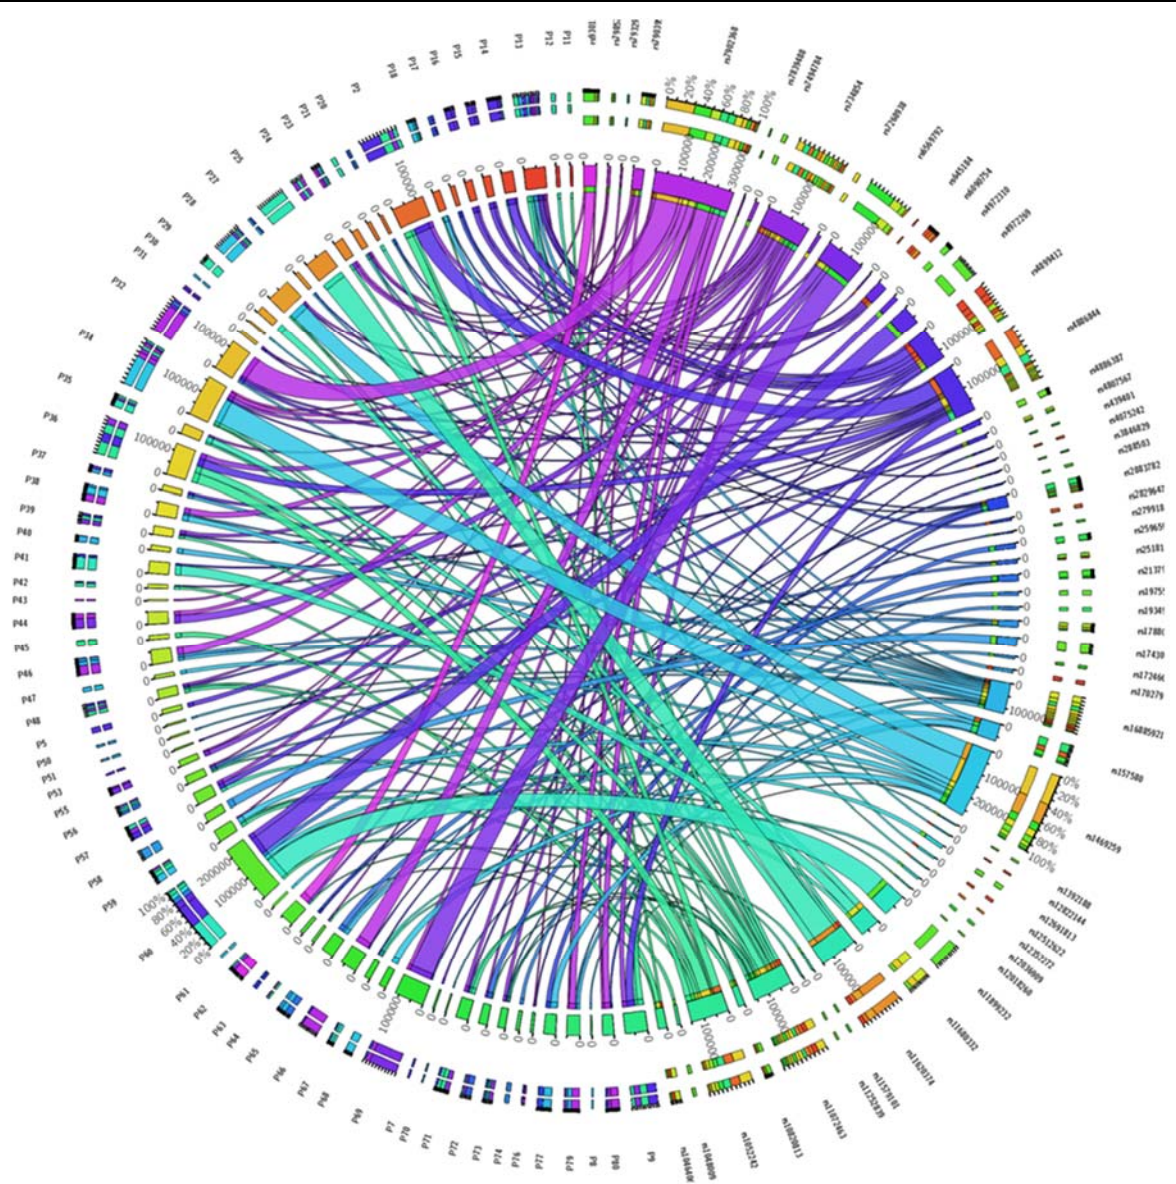

Supplementary Fig. 4(C). NC 80\*80\_Association\_P\_values\_Circos

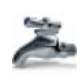

Supplementary pipe. File

Supplementary pipe. file.pipe
